# Supplementary material for: Hydroxytyrosol and tyrosol sulfate metabolites protect against the oxidized cholesterol pro-oxidant effect in Caco-2 human enterocyte-like cells
Source: Royal Society of Chemistry journal article supplement (doi:10.1039/c5fo00074b), 2015-10-08
Supplement: c5fo00074b1.pdf [file c5fo00074b1.pdf]

# Hydroxytyrosol and tyrosol sulfate metabolites protect against oxidized cholesterol pro-oxidant effect in Caco-2 human enterocyte-like cells.

Angela Atzeri, Ricardo Lucas, Alessandra Incani, Pablo Peñalver, Alberto  
Zafra-Gómez, M. Paola Melis, Roberto Pizzala, Juan C. Morales and  
Monica Deiana

## Contents

|                                                                              |        |
|------------------------------------------------------------------------------|--------|
| <sup>1</sup> H-NMR and <sup>13</sup> C-NMR spectra of compound <b>7</b>      | S2     |
| <sup>1</sup> H-NMR and <sup>13</sup> C-NMR spectra of compound <b>5</b>      | S3     |
| <sup>1</sup> H-NMR and <sup>13</sup> C-NMR spectra of compounds <b>9-10</b>  | S4     |
| <sup>1</sup> H-NMR and <sup>13</sup> C-NMR spectra of compounds <b>11-12</b> | S5     |
| <sup>1</sup> H-NMR and <sup>13</sup> C-NMR spectra of compounds <b>3-4</b>   | S6     |
| Tyr, HT, Tyr-sulfate and HT-sulfate stability/uptake in Caco-2 culture       | S7-S12 |

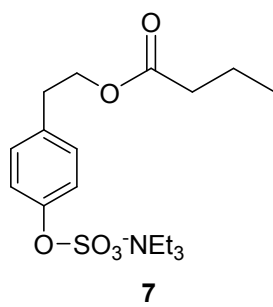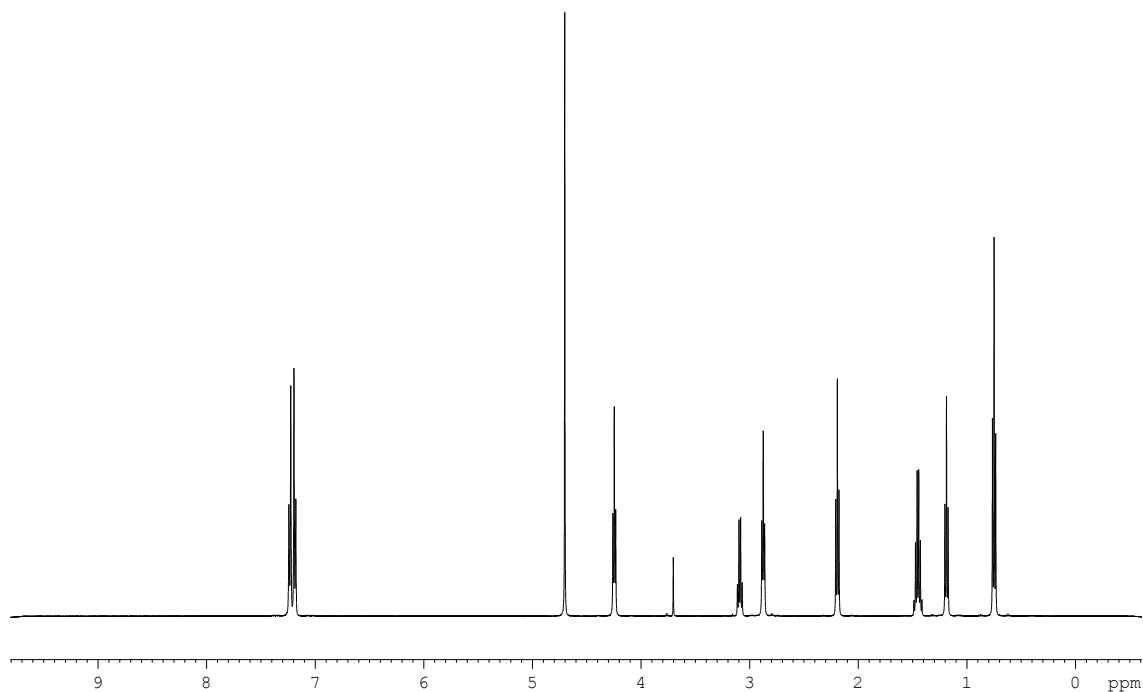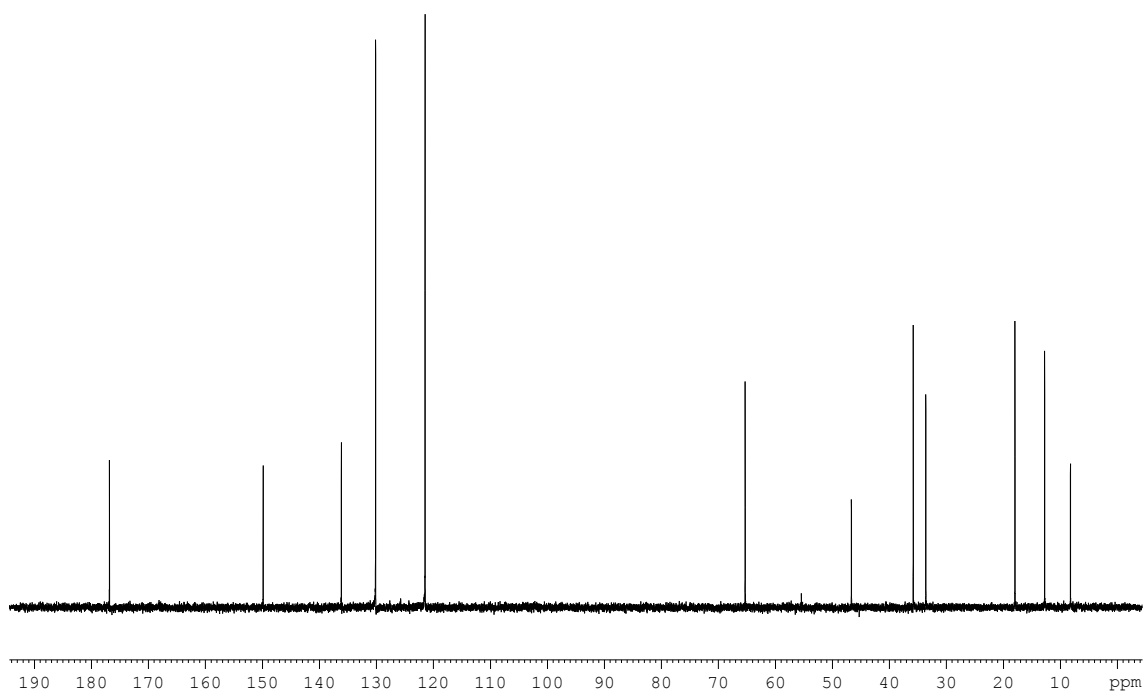

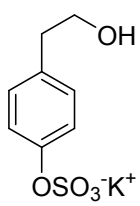

**5**

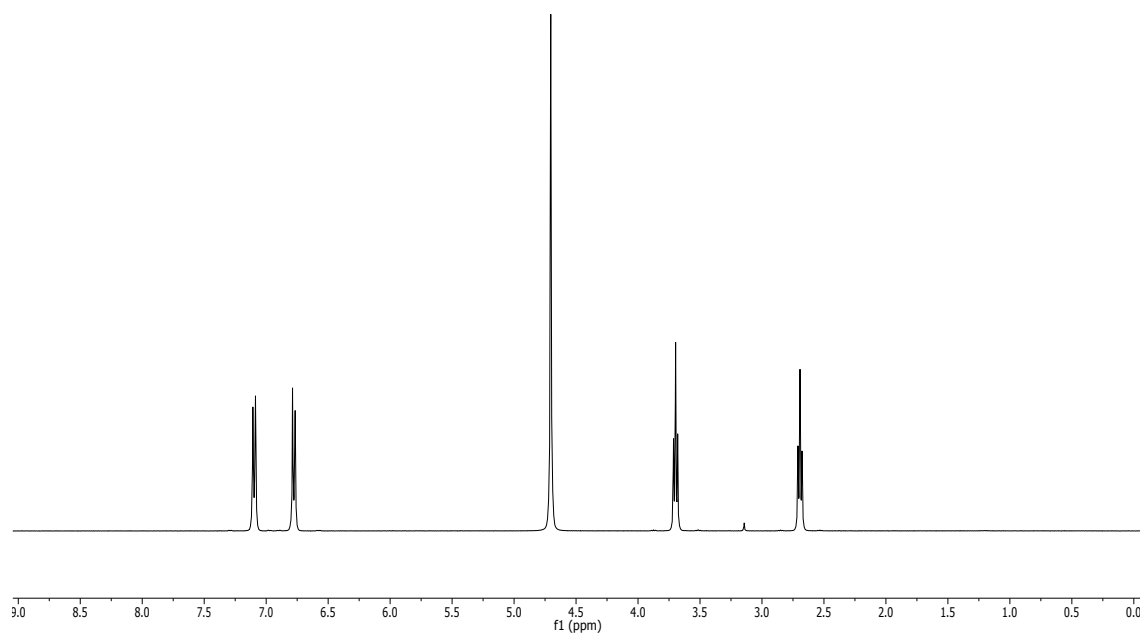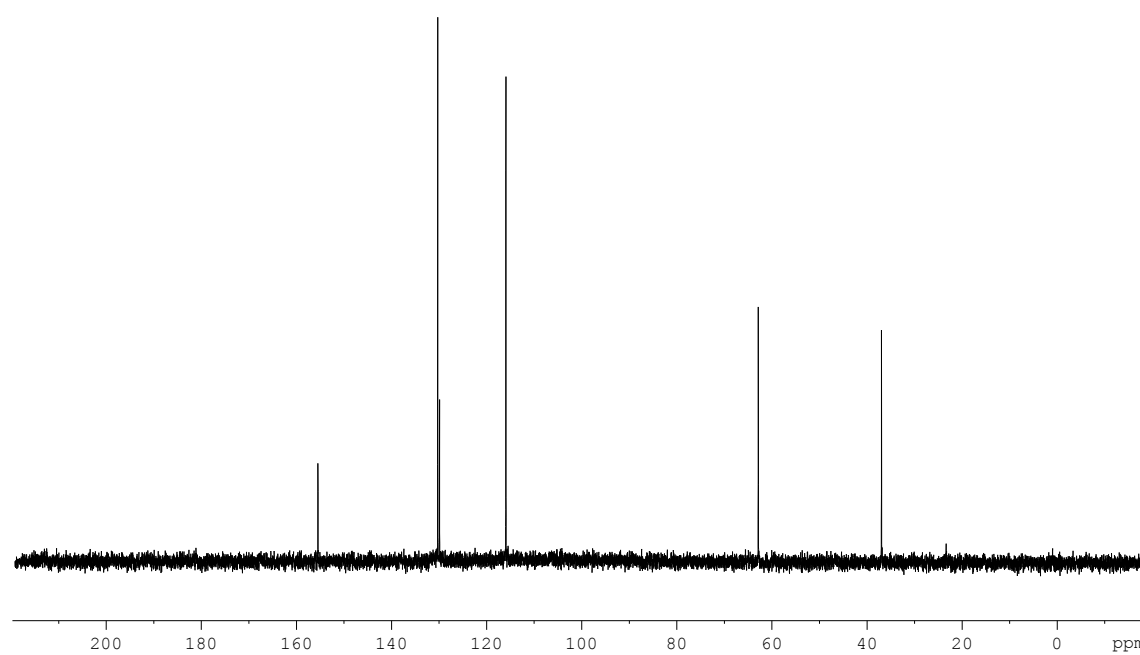

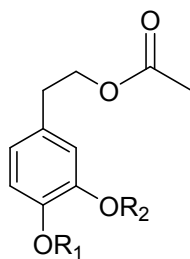

**9**  $R_1=H$ ,  $R_2=\text{TBDMS}$   
**10**  $R_1=\text{TBDMS}$ ,  $R_2=H$

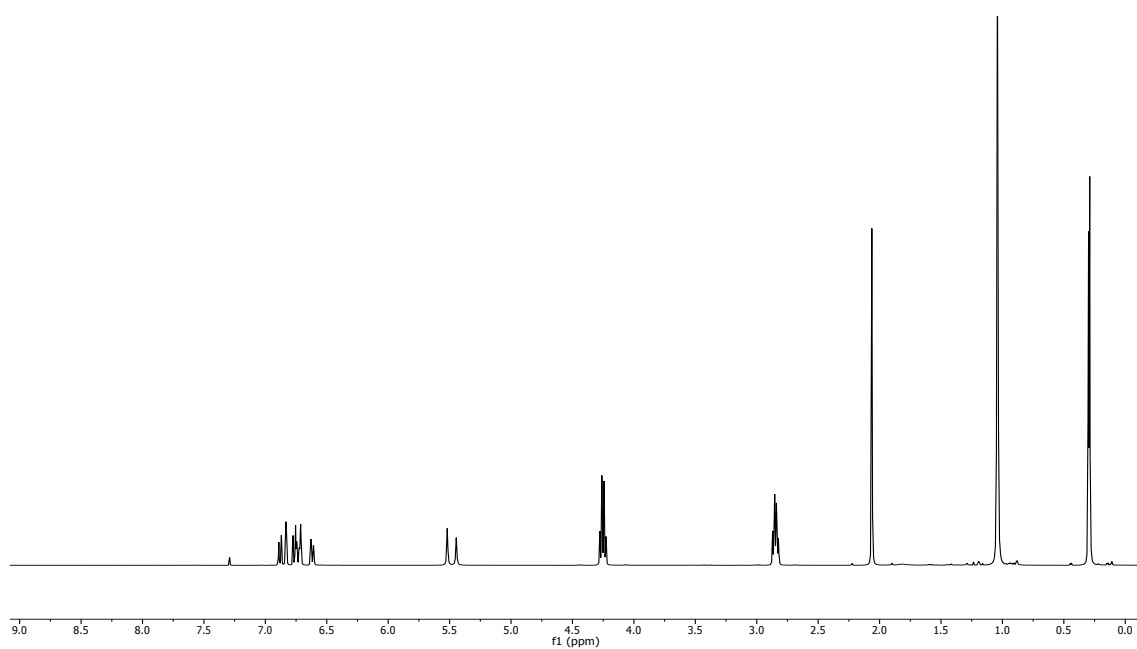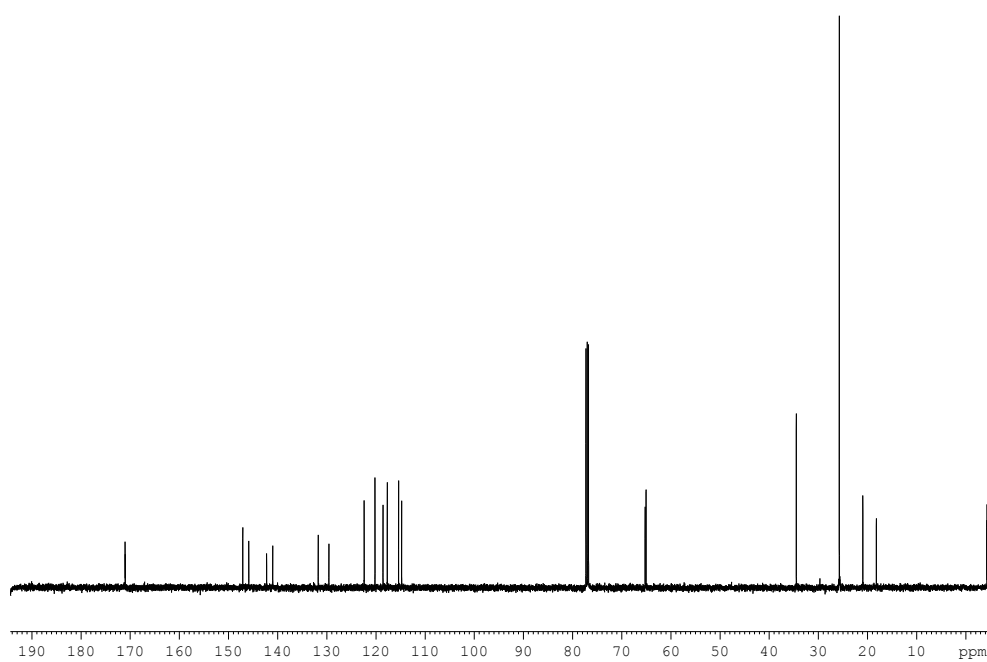

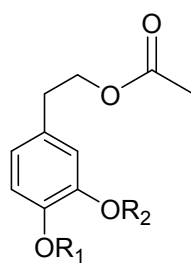

**11**  $R_1 = \text{SO}_3^- \text{NEt}_3$ ,  $R_2 = \text{TBDMS}$

**12**  $R_1 = \text{TBDMS}$ ,  $R_2 = \text{SO}_3^- \text{NEt}_3$

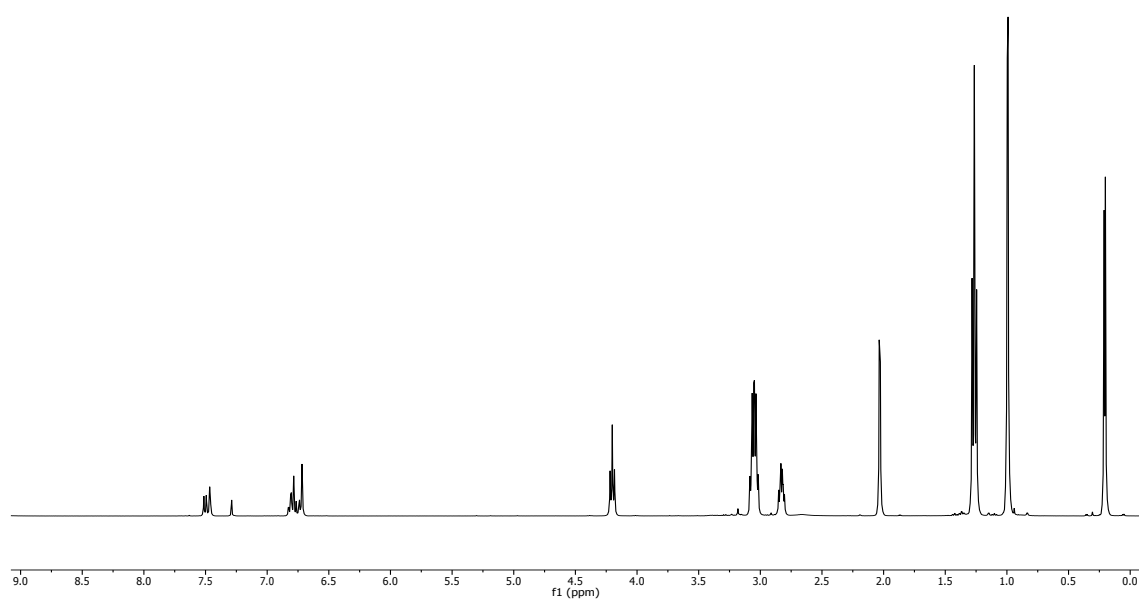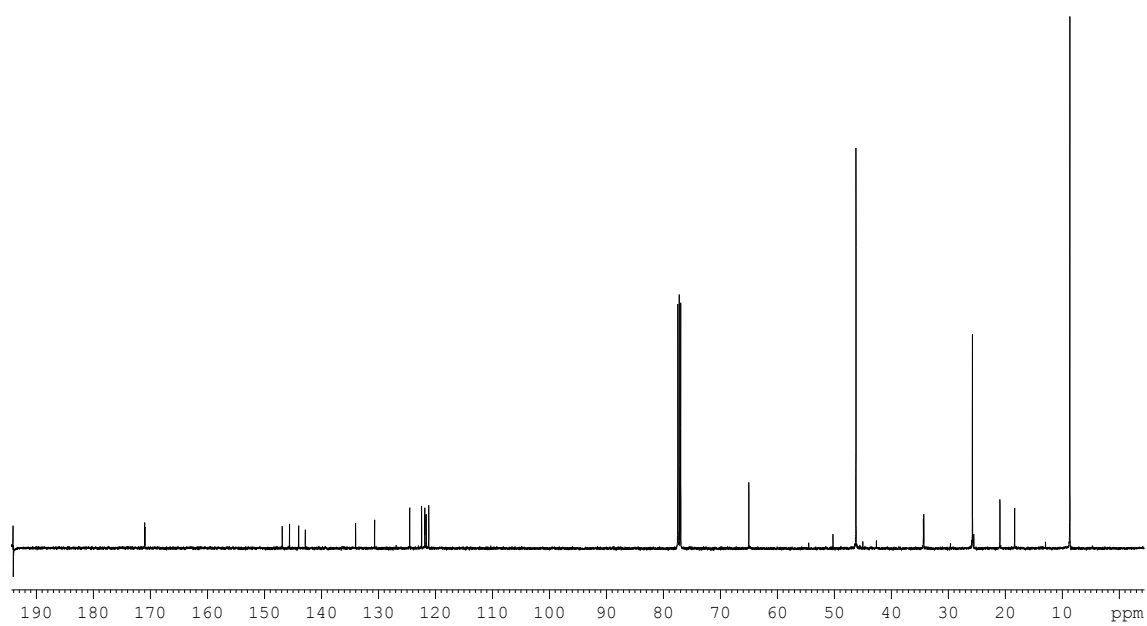

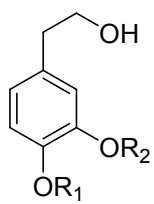

**3**  $R_1 = \text{SO}_3^- \text{K}^+$ ,  $R_2 = \text{H}$

**4**  $R_1 = \text{H}$ ,  $R_2 = \text{SO}_3^- \text{K}^+$

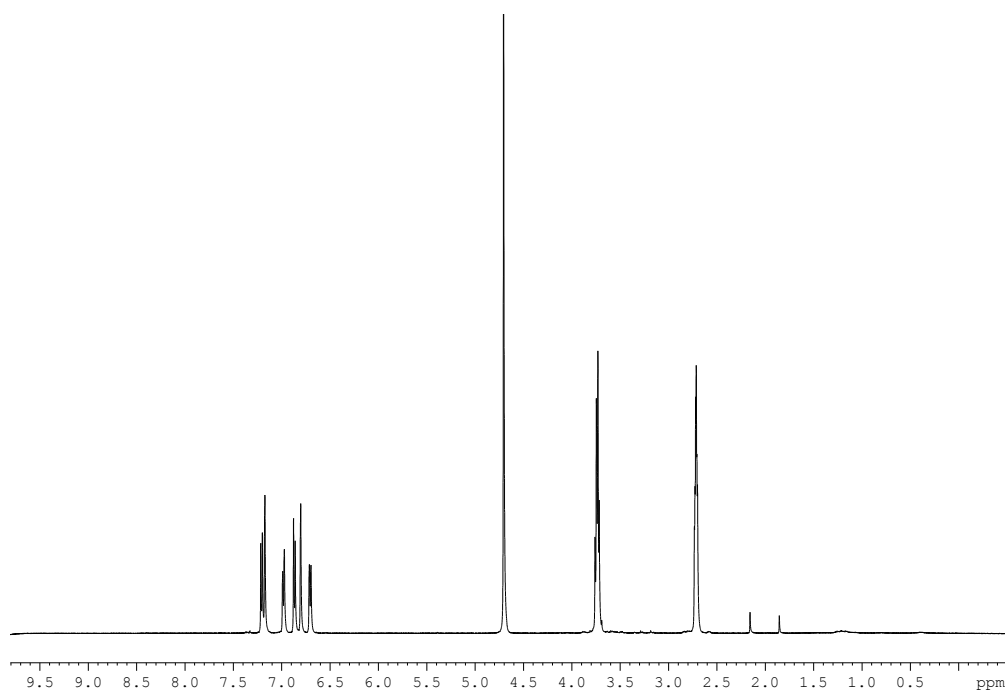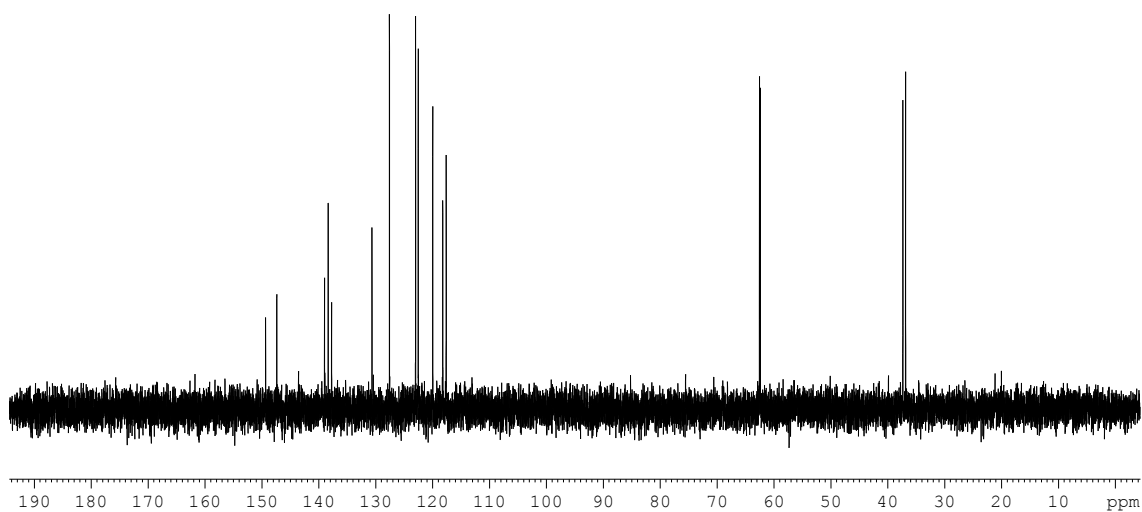

## **Tyr, HT and their sulfated metabolites stability/uptake in Caco-2 culture**

### **a) Method description**

#### **a.1.- Instrument and software**

A Waters Acquity UPLC™ H-class system (Waters, Manchester, UK) was used for chromatographic separation. The column was an Acquity UPLC<sup>R</sup> BEH C18 (2.1 x 100 mm, 1.7 μM). A QDA single quadrupole mass spectrometer (Waters) equipped with an orthogonal Z-spray™ electrospray ionization (ESI) source was used for metabolites detection. Empower 3 software was used for instrument control, peak detection and integration. Data analysis was done in Microsoft Excel.

#### **a.2.- Samples preparation**

Caco-2 cells were seeded at a density of about 10.000 cells/ml on Petri dishes and used 15 days post-seeding. Medium was then discarded and the cells were treated with the phenolic compounds (250 μM, in order to obtain detectable metabolites) in 10 ml of medium (2.5% FBS) for several incubation times (30 minutes, 1 hour, 18 hours and 24 hours). After incubation 1 ml of medium was collected and reserved for further UPLC analysis and the rest was thrown away. The Petri dishes were then washed with ice-cold PBS and 500 ml of lysis buffer (H<sub>2</sub>O: MeOH 50: 50 v/ v + 0.1 % HCl) was added to the cells. The lysed cells were then scrapped, collected in eppendorf tubes and stored on ice for 45 minutes. Later on centrifugation of the samples (10 minutes at 4°C and 12.000 g) was performed and the supernatants collected for UPLC studies.

All the samples were homogenised by vortexing and filtered through a 0.2 μm nylon filter prior to be injected in the instrument.

Control samples were also prepared incubating the tested phenolic compounds for 24h in absence of cells at 0°C or at 37°C, in medium or lysis buffer, to evaluate their stability.

#### **a.3.- UPLC-MS conditions**

Chromatographic separation was performed using a binary gradient mobile phase consisting of H<sub>2</sub>O+ NH<sub>4</sub>OAc 1% at pH 4.6 (solvent A) and MeOH (solvent B). The flow rate was 0.4 ml/min, the column was maintained at 30°C and the injected volume was 10 μl. gradient conditions were as follows: 97% of A for 2 min, then 93% of A for 5 more minutes and finally 0 % of A (100% B) for 3 minutes to clean the column and 4 more minutes at the initial conditions (97% of A) to equilibrate the column.

The mass spectrometer (MS) was operated with electrospray ionization (ESI) in negative ion mode [M-H]<sup>-</sup> and the data were collected by selected ion recording mode (SIR).

All compounds were quantified respect to its own calibration curve (1-250 $\mu$ M) and results were expressed as percentage of compound remaining.

## b) Compounds identification

### b.1.- PDA 280nm MW=137 (Tyr)

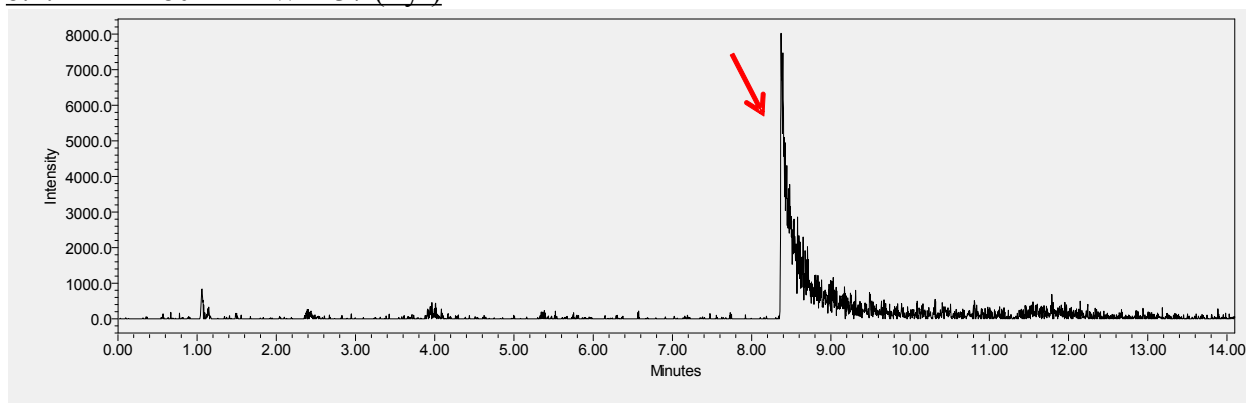

### b.2.- PDA 280nm MW=217 (Tyr SO<sub>3</sub>)

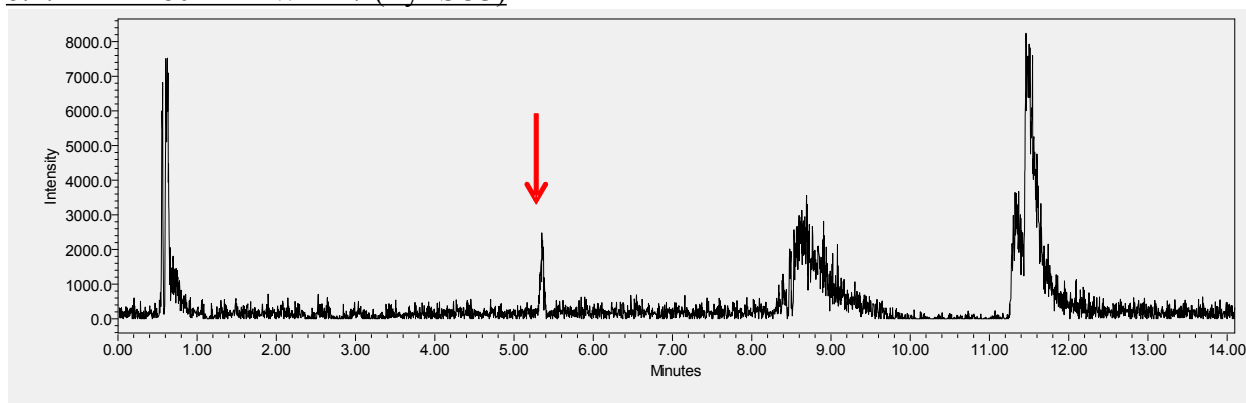

### b.3.- PDA 280nm MW=311 (Tyr GlcA)

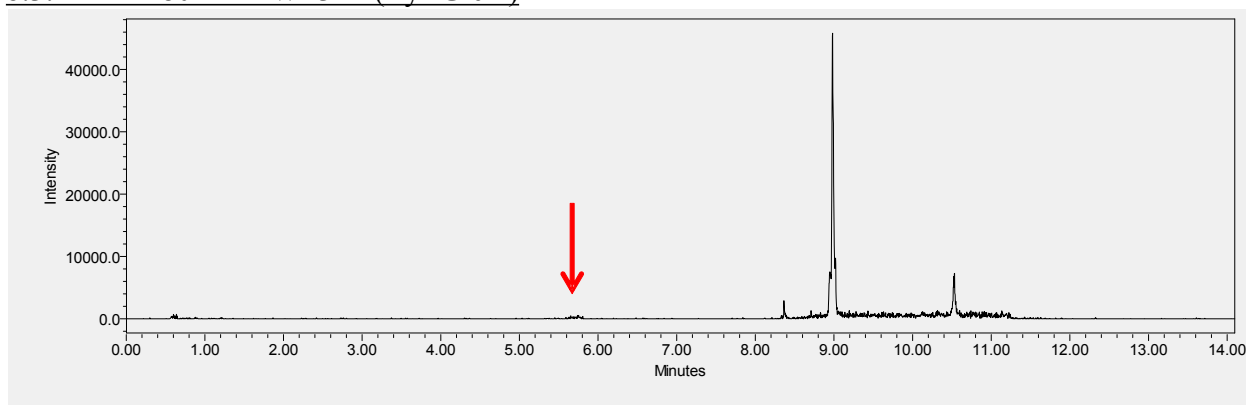

b.4.- PDA 280nm MW=153 (HT)

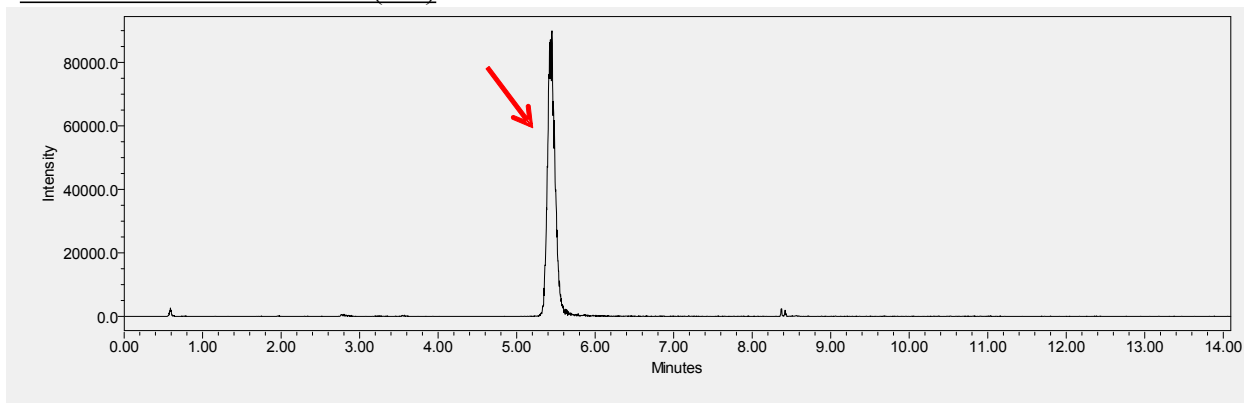

b.5.- PDA 280nm MW=233 (HT SO3)

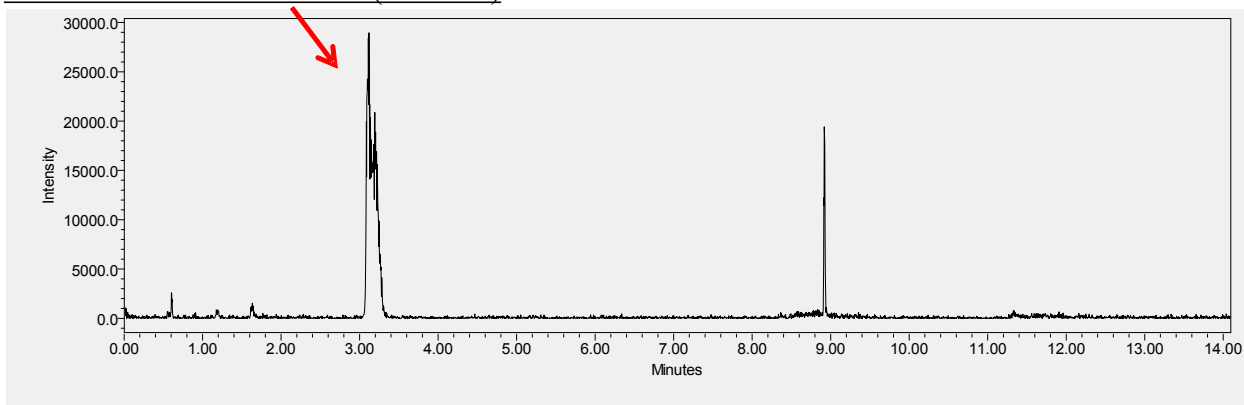

b.6.- PDA 280nm MW=339 (HT GlcA)

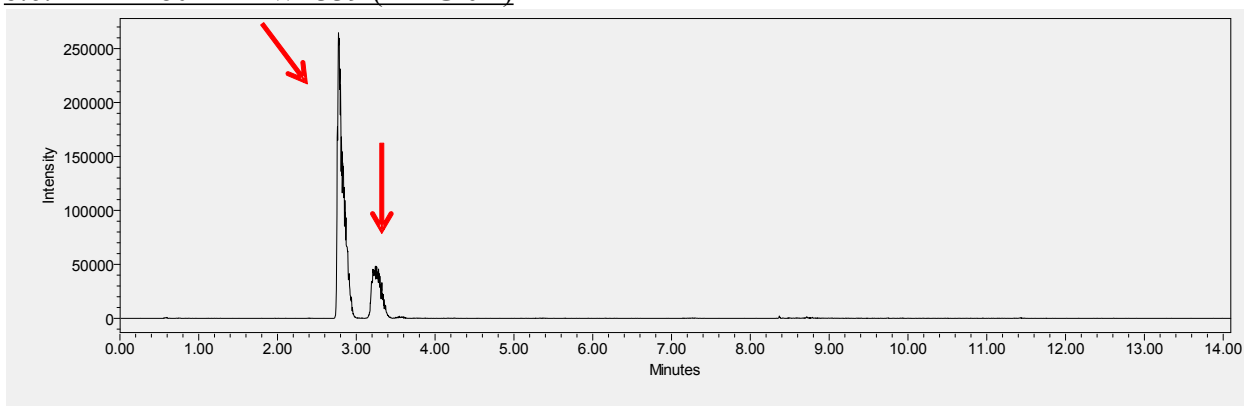

b.7.- PDA 280nm MW=247 (Homov SO3)

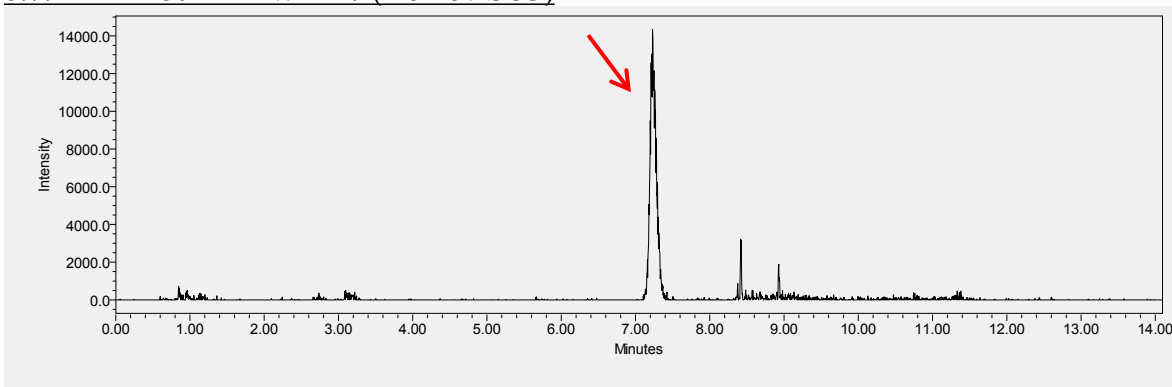

### c) Calibration curves

#### c.1.- Tyr

$$y = 268,85x - 1986,5$$

$$R^2 = 0,9921$$

#### c.2.- Tyr-SO<sub>3</sub>

$$y = 10,252x + 3437$$

$$R^2 = 0,9736$$

#### c.3.-Tyr-GlcA

$$y = 10,861x - 31,844$$

$$R^2 = 0,9741$$

#### c.4.- HT

$$y = 2320,6x + 15985$$

$$R^2 = 0,9959$$

#### c.5.- HT-SO<sub>3</sub>

$$y = 742,6x - 10960$$

$$R^2 = 0,9811$$

#### c.6.- HT-GlcA a

$$y = 5388,2x - 15128$$

$$R^2 = 0,9991$$

#### c.7.-HT-GlcA b

$$y = 1589,8x + 5286,2$$

$$R^2 = 0,9939$$

#### c.8.- Homov-SO<sub>3</sub>

$$y = 322,69x + 955,85$$

$$R^2 = 0,9983$$

Tyr-SO<sub>3</sub>, Tyrosol sulfate; Tyr-GlcA, Tyrosol glucuronide; HT-SO<sub>3</sub>, Hydroxytyrosol sulfate; HT-GlcA a,b, Hydroxytyrosol-3'-O-glucuronide and Hydroxytyrosol-4'-O-glucuronide; Homov-SO<sub>3</sub>, Homovanillic alcohol sulfate.

### d) Analysis

Results expressed as percentage of compound remaining (100% value from 250μM data of the calibration curve in all the cases but Tyr-SO<sub>3</sub><sup>-</sup>, where the Tyr-SO<sub>3</sub><sup>-</sup> 250μM data at t=0 in culture medium was used instead)

#### d.1.- HT and HTSO<sub>3</sub> derivatives:

| Compound           | Incubation time | Supernatants (from lysed cells) |                    |         |                       | Medium |                    |         |                       | Total  |
|--------------------|-----------------|---------------------------------|--------------------|---------|-----------------------|--------|--------------------|---------|-----------------------|--------|
|                    |                 | HT                              | HT-SO <sub>3</sub> | HT-GlcA | Homov-SO <sub>3</sub> | HT     | HT-SO <sub>3</sub> | HT-GlcA | Homov-SO <sub>3</sub> |        |
| HT                 | 30'             | 4,40                            | 7,80               | ---     | ---                   | 59,20  | ---                | ---     | ---                   | 71,40  |
|                    | 60'             | 4,40                            | 13,60              | ---     | ---                   | 56,40  | 1,70               | ---     | ---                   | 76,10  |
|                    | 18 h            | 3,90                            | 22,40              | ---     | 12,80                 | 48,80  | 32,50              | 0,20    | 0,60                  | 121,2  |
|                    | 24 h            | 0,00                            | 22,40              | ---     | 72,60                 | 6,60   | 86,20              | 0,40    | 14,70                 | 202,9  |
| HT-SO <sub>3</sub> | 30'             | ---                             | 26,20              | ---     | 2,10                  | 21,70  | 26,20              | ---     | ---                   | 76,20  |
|                    | 60'             | ---                             | 2,20               | ---     | 2,20                  | 26,30  | 69,20              | ---     | ---                   | 99,9   |
|                    | 18 h            | ---                             | 27,00              | ---     | 50,10                 | 3,90   | 86,20              | ---     | 4,20                  | 171,40 |
|                    | 24 h            | ---                             | 8,00               | ---     | 51,30                 | 0,00   | 36,10              | 0,20    | 9,90                  | 105,50 |

Total values above a 100% (at longer incubation times) are due to errors in HT-SO<sub>3</sub><sup>-</sup> determination due to the bad ionization of the compound which also renders in a calibration curve not as good as for the parent compound HT

HT controls (HT incubated in absence of cells):

- HT in medium at 0°C for 24h: 58,30% HT remaining
- HT in medium at 37°C for 24h: 10,50 % HT remaining
- HT in lysis buffer at 37°C for 24h: 64,20 % HT remaining

HT-SO<sub>3</sub> controls (HT-SO<sub>3</sub> incubated in absence of cells):

- HT-SO<sub>3</sub> in medium at 0°C for 24h: 19,90 % HT + 23,40 HT-SO<sub>3</sub> remaining
- HT-SO<sub>3</sub> in medium at 37°C for 24h: 4,80 % HT + 8,40% HT-SO<sub>3</sub> remaining
- HT-SO<sub>3</sub> in lysis buffer at 37°C for 24h: 27,75 % HT + 27,80% HT-SO<sub>3</sub> remaining

d.2.- Tyr and Tyr-SO<sub>3</sub> derivatives:

| Compound            | Incubation time | Supernatants (from lysed cells) |                     | Medium |                     | Total  |
|---------------------|-----------------|---------------------------------|---------------------|--------|---------------------|--------|
|                     |                 | Tyr                             | Tyr-SO <sub>3</sub> | Tyr    | Tyr-SO <sub>3</sub> |        |
| Tyr                 | 30'             | 2,90                            | ---                 | 50,70  | ---                 | 53,60  |
|                     | 60'             | 3,00                            | ---                 | 45,10  | 3,35                | 51,45  |
|                     | 18 h            | 7,50                            | 22,38               | 39,00  | 65,70               | 134,58 |
|                     | 24 h            | 3,70                            | 16,87               | 69,20  | 81,50               | 171,27 |
| Tyr-SO <sub>3</sub> | 30'             | 2,90                            | ---                 | 96,80  | 6,60                | 106,3  |
|                     | 60'             | 3,70                            | ---                 | 81,20  | 9,54                | 94,44  |
|                     | 18 h            | 8,00                            | 32,51               | 70,70  | 89,97               | 201,18 |
|                     | 24 h            | 6,50                            | 33,05               | 41,10  | 51,21               | 135,86 |

Total values above a 100% (at longer incubation times) are due to errors in Tyr-SO<sub>3</sub>-determination due to the bad ionization of the compound which also renders in a calibration curve not as good as for the parent compound Tyr.

Tyr controls (Tyr incubated in absence of cells):

- Tyr in medium at 0°C for 24h: 38,70% Tyr remaining
- Tyr in medium at 37°C for 24h: 39,70 % Tyr remaining
- Tyr in lysis buffer at 37°C for 24h: 31,50 % Tyr remaining

Tyr-SO<sub>3</sub> controls (Tyr-SO<sub>3</sub> incubated in absence of cells):

- Tyr-SO<sub>3</sub> in medium at 0°C for 24h: 64,20 % Tyr (0,00 Tyr-SO<sub>3</sub>)remaining
- Tyr-SO<sub>3</sub> in medium at 37°C for 24h: 73,60 % Tyr (0,00 Tyr-SO<sub>3</sub>)remaining
- Tyr-SO<sub>3</sub> in lysis buffer at 37°C for 24h: 35,40 % Tyr (0,00 Tyr-SO<sub>3</sub>)remaining

Untreated cells:

- Cells incubated at 37°C for 24h without any of the tested compounds, supernatant from lysed cells or medium: 0% of everything
